# Supplementary material for: Thermodynamic instability of siRNA duplex is a prerequisite for dependable prediction of siRNA activities
Source: PubMed Central journal article supplement — Nucleic Acids Res. 2007 Sep 20;35(18):e123. doi: 10.1093/nar/gkm699 (PMC2094068; doi:10.1093/nar/gkm699), 2007-09-20
Supplement: nar_gkm699_1.pdf [file nar_gkm699_1.pdf]

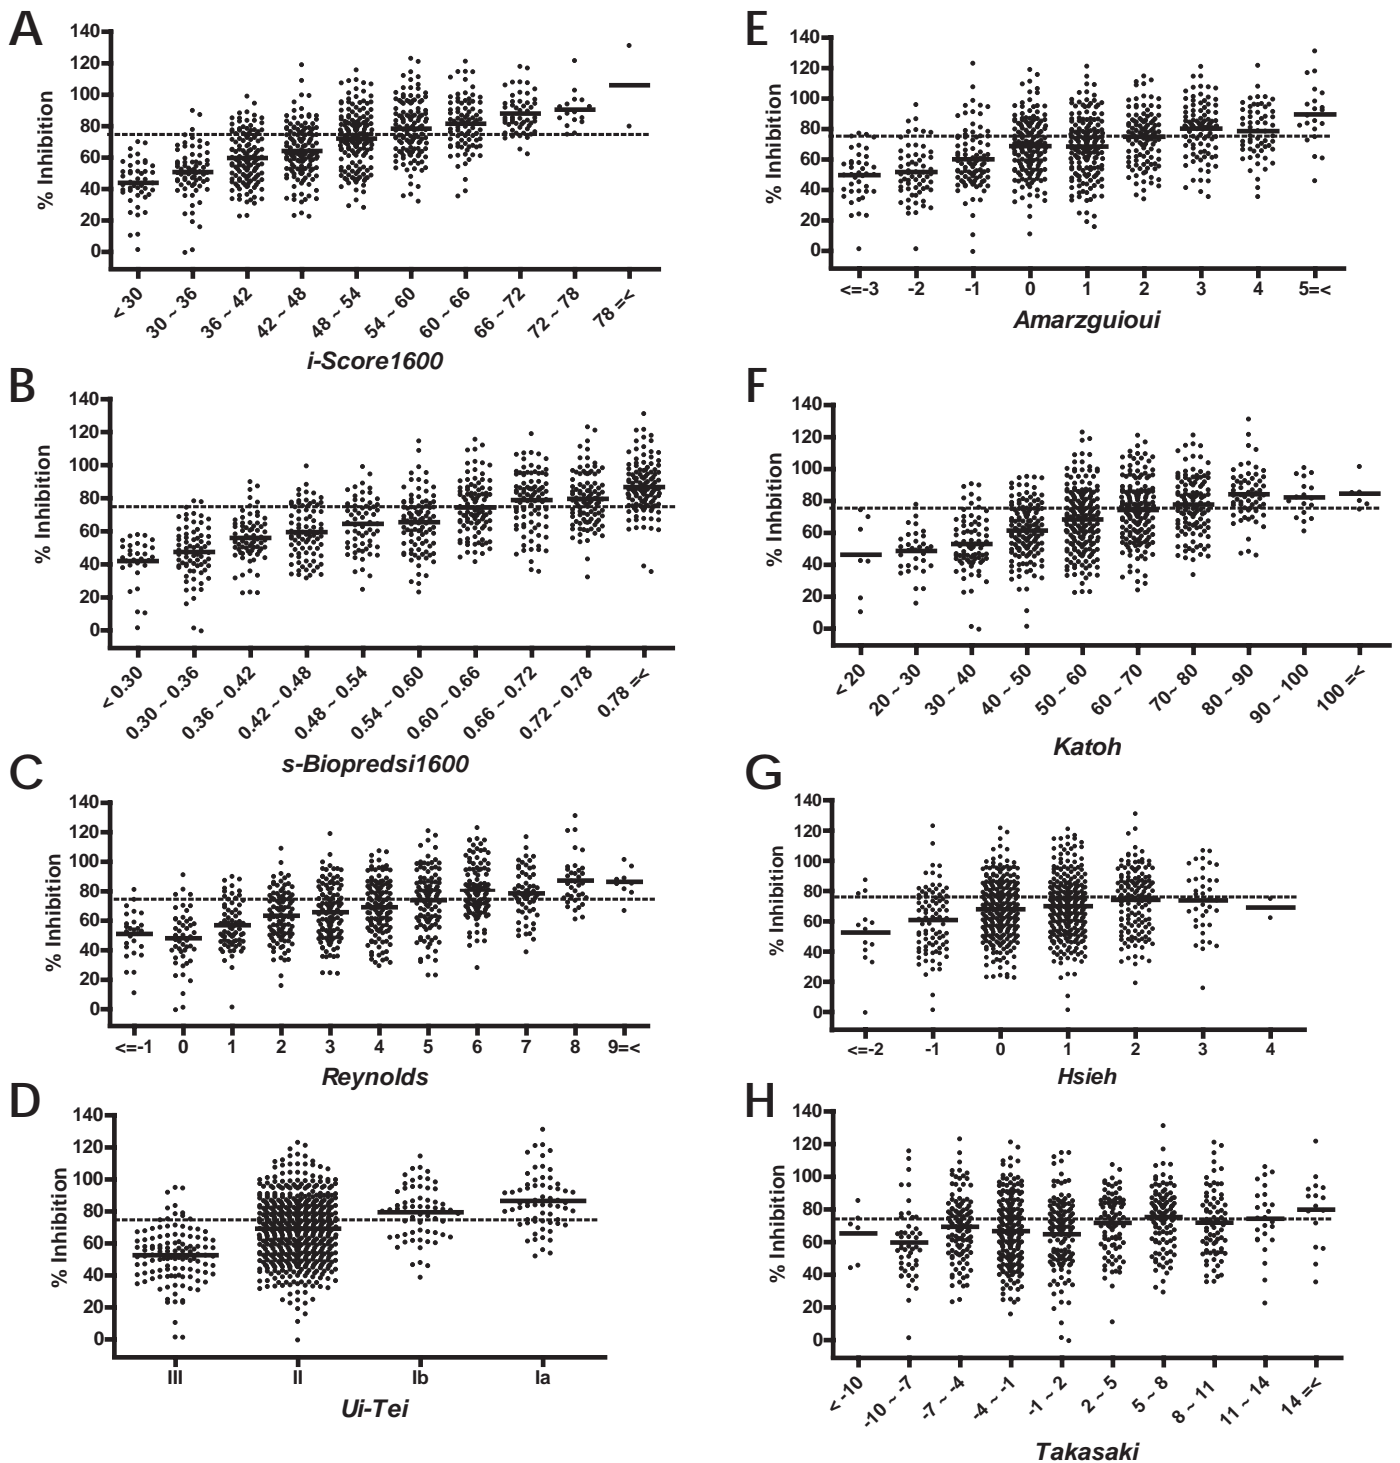

**Supplementary Figure 1.** Comparison of eight algorithms under conditions where overfitting is strictly avoided. The *i-Score1600* and *s-Biopredisi1600* scores are explained in the legend for Table 2. The observed siRNA activities in subset A831 are plotted against predicted siRNA activities by *i-Score1600* (A), *s-Biopredisi1600* (B), *Reynolds* (C), *Ui-Tei* (D), *Amarzguioui* (E), *Katoh* (F), *Hsieh* (G), and *Takasaki* (H). Continuous numeric scores given by algorithms in A, B, F, and H are evenly divided into ten ranks to enable visual comparison with ordinal or nominal scores in C, D, E, and G. Short bars indicate the mean at each rank. Dotted lines indicate 75% inhibition. Note that the *Hsieh* (G) and *Takasaki* (H) scores fail to predict siRNA activities for this dataset.
