# Supplementary material for: Thermodynamic instability of siRNA duplex is a prerequisite for dependable prediction of siRNA activities
Source: PubMed Central journal article supplement — Nucleic Acids Res. 2007 Sep 20;35(18):e123. doi: 10.1093/nar/gkm699 (PMC2094068; doi:10.1093/nar/gkm699), 2007-09-20
Supplement: nar_gkm699_2.pdf [file nar_gkm699_2.pdf]

**Supplementary Table 1.** Scoring parameters of *i-Score*.

| Pos. | 1     | 2     | 3     | 4    | 5    | 6    | 7     | 8    | 9    | 10   | 11   | 12   | 13   | 14    | 15   | 16   | 17   | 18    | 19    |
|------|-------|-------|-------|------|------|------|-------|------|------|------|------|------|------|-------|------|------|------|-------|-------|
| A    | 6.74  | 5.96  | 5.16  | 4.34 | 3.19 | 1.54 | 4.79  | 2.99 | 2.49 | 5.75 | 3.36 | 3.19 | 4.15 | 4.41  | 2.43 | 4.12 | 3.00 | -1.13 | -4.02 |
| C    | -3.92 | -1.55 | -0.07 | 1.03 | 1.55 | 1.61 | -1.46 | 2.29 | 2.91 | 1.19 | 1.57 | 2.37 | 1.65 | 2.57  | 3.17 | 2.24 | 2.66 | 6.08  | 8.02  |
| G    | -6.85 | -1.03 | 1.54  | 1.94 | 1.39 | 2.30 | 1.73  | 1.37 | 1.44 | 2.30 | 1.28 | 1.48 | 0.85 | -1.22 | 2.06 | 1.57 | 1.12 | 3.11  | 6.39  |
| U    | 14.43 | 7.03  | 3.79  | 3.10 | 4.28 | 4.96 | 5.35  | 3.76 | 3.56 | 1.16 | 4.20 | 3.38 | 3.76 | 4.64  | 2.75 | 2.47 | 3.63 | 2.35  | 0.02  |

Each number represents a probability score “P” of nucleotide “n” at position “m” on the antisense strand (see Figure 1).
