# Supplementary material for: Thermodynamic instability of siRNA duplex is a prerequisite for dependable prediction of siRNA activities
Source: PubMed Central journal article supplement — Nucleic Acids Res. 2007 Sep 20;35(18):e123. doi: 10.1093/nar/gkm699 (PMC2094068; doi:10.1093/nar/gkm699), 2007-09-20
Supplement: nar_gkm699_3.pdf [file nar_gkm699_3.pdf]

**Supplementary Table 2.** Correlation coefficients among four algorithms.

|                                 | <i>i-Score</i> | <i>s-Biopredsi</i> | <i>Thermo<br/>Composition21</i> | <i>DSIR</i> |
|---------------------------------|----------------|--------------------|---------------------------------|-------------|
| <i>i-Score</i>                  | 1.000          | -                  | -                               | -           |
| <i>s-Biopredsi</i>              | 0.945          | 1.000              | -                               | -           |
| <i>Thermo<br/>Composition21</i> | 0.870          | 0.873              | 1.000                           | -           |
| <i>DSIR</i>                     | 0.927          | 0.946              | 0.868                           | 1.000       |

The correlation coefficients are calculated using dataset B.
